# ***ClockBase*: a comprehensive platform for biological age profiling in human and mouse**

Kejun Ying<sup>1,2</sup>, Alexander Tyshkovskiy<sup>1</sup>, Alexandre Trapp<sup>1</sup>, Hanna Liu<sup>1,3</sup>, Mahdi Moqri<sup>1,4,5</sup>, Csaba Kerepesi<sup>1,6</sup>, Vadim N. Gladyshev<sup>1, □□</sup>

<sup>1</sup> Division of Genetics, Department of Medicine, Brigham and Women's Hospital and Harvard Medical School, Boston, MA, USA.

<sup>2</sup> T. H. Chan School of Public Health, Harvard University, Boston, MA.

<sup>3</sup> Massachusetts College of Pharmacy and Health Sciences, Boston, MA, USA

<sup>4</sup> Department of Obstetrics & Gynecology, Stanford School of Medicine, Stanford University, Stanford, CA, USA

<sup>5</sup> Institute for Stem Cell Biology and Regenerative Medicine, Stanford School of Medicine, Stanford, CA, USA

<sup>6</sup> Institute for Computer Science and Control (SZTAKI), Budapest, Hungary

□ email: [vgladyshev@rics.bwh.harvard.edu](mailto:vgladyshev@rics.bwh.harvard.edu)

## **ABSTRACT**

Aging represents the greatest risk factor for chronic diseases and mortality, but to understand it we need the ability to measure biological age. In recent years, many machine learning algorithms based on omics data, termed aging clocks, have been developed that can accurately predict the age of biological samples. However, there is currently no resource for systematic profiling of biological age. Here, we describe *ClockBase*, a platform that features biological age estimates based on multiple aging clock models applied to more than 2,000 DNA methylation datasets and nearly 200,000 samples. We further provide an online interface for statistical analyses and visualization of the data. To show how this resource could facilitate the discovery of biological age-

24 modifying factors, we describe a novel anti-aging drug candidate, zebularine, which reduces the  
25 biological age estimates based on all aging clock models tested. We also show that pulmonary  
26 fibrosis accelerates epigenetic age. Together, *ClockBase* provides a resource for the scientific  
27 community to quantify and explore biological ages of samples, thus facilitating discovery of new  
28 longevity interventions and age-accelerating conditions.

## 29 INTRODUCTION

30 Aging is an extremely complex biological process that represents the greatest risk factor for  
31 chronic diseases<sup>1,2</sup>. This makes the aging process a desirable target for preventing age-related  
32 diseases and reducing their global burden<sup>3-5</sup>. However, to associate aging with diseases and in-  
33 terventions that target aging, it is important to be able to measure the rate of aging<sup>6,7</sup>. In recent  
34 years, various machine-learning models based on omics data have emerged (also known as aging  
35 clocks), which can accurately predict the age of samples derived from different tissues, cell  
36 types, and even single cells<sup>6,8,9</sup>. Various molecular markers have been shown to have the poten-  
37 tial to profile the rate of aging, including DNA methylation, transcriptome, proteome,  
38 metabolome, microbiome, and other types of omics data<sup>6</sup>. In addition to assessing chronological  
39 age, many aging clock models were trained to reveal associations with various aging-related  
40 phenotypes and mortality<sup>10</sup>.

41 Aging clocks based on the methylation levels of CpGs are the earliest and some of the most ac-  
42 curate age predictors<sup>11,12</sup>. Such clocks are represented by the blood biomarker developed by  
43 Hannum and colleagues<sup>12</sup> and the human pan-tissue epigenetic clock developed by Horvath, the  
44 latter trained on 51 different tissue types<sup>11</sup>. These epigenetic clocks could accurately predict the  
45 chronological age of samples, but since they are trained based only on age, only a fraction of the  
46 biological variation of the sample could be captured by them. Subsequently, the “second-  
47 generation” epigenetic clocks emerged: instead of training solely on chronological age, these  
48 clocks incorporated health-related phenotypic information and therefore could reveal a stronger  
49 association with aging-related phenotypes. For example, PhenoAge was trained based on the  
50 phenotypic age score, which was derived from chronological age and certain mortality-related  
51 blood test parameters<sup>13</sup>. Additionally, GrimAge emerged as a robust predictor that is based on  
52 multiple phenotypes and the remaining time to death<sup>14</sup>. More recently, DunedinPOAm and

53 DunedinPACE biomarkers were reported that are trained based on the pace of biological aging  
54 that was derived from multiple clinical biomarkers measured in the Dunedin longitudinal cohort  
55 <sup>15,16</sup>. We also developed DamAge and AdaptAge, which are causality-informed clock models  
56 that could separately measure age-related damage and adaptation <sup>17</sup>. Similar to humans, multiple  
57 mouse epigenetic clocks were developed and shown to be able to robustly predict the chronolog-  
58 ical age of mice <sup>18,19</sup>.

59 One of major applications of aging clocks is the identification of conditions or treatments that  
60 modify the aging rate of individuals or reduce their biological age, which could potentially lead  
61 to the development of anti-aging therapies <sup>20,21</sup>. For example, parabiosis and iPSC reprogram-  
62 ming were shown to be associated with the decrease in epigenetic age <sup>22-24</sup>, and unhealthy life-  
63 styles such as smoking and stress could accelerate epigenetic aging <sup>10,25</sup>. Although this type of  
64 research has been described in many publications, there has been no systematic effort to identify  
65 the impact of available interventions on biological age. One reason is that various clock models  
66 require different transformations and pre-processing of omics data, making it difficult to use  
67 them and compare them across studies. Some tools exist that try to tackle this problem, but they  
68 typically only utilize a small subset of human methylation clocks <sup>26</sup>. Moreover, although a large  
69 amount of omics data has been acquired by the scientific community that is publicly available  
70 through the databases such as Gene Expression Omnibus (GEO) <sup>27</sup>, there is currently no public  
71 resource that could uniformly process them for biological age profiling.

72 To address this problem, we created *ClockBase*, a comprehensive platform for biological age  
73 profiling in humans and mice. We curated 11 best-performing aging clock models, including ep-  
74 igenetic clocks for humans and mice, and used them to profile the biological age of samples  
75 (Figure 1). We re-processed over 2,000 publicly available DNA methylation datasets from GEO.  
76 In total, *ClockBase* contains the biological age information for around 200,000 samples in both  
77 mice and humans under various experimental settings. Besides preprocessed data, users can up-  
78 load their data to *ClockBase* for biological age calculation. *ClockBase* provides an interactive  
79 analysis tool to allow users to perform statistical analyses and visualization of biological age  
80 online. We believe that *ClockBase* may provide a valuable resource for the scientific community  
81 to explore the biological age of samples, and thus facilitate the discovery of new longevity inter-  
82 ventions and age-accelerating conditions.

## 83 **Results**

### 84 **Overview of *ClockBase***

85 To develop *ClockBase*, we processed over 2,000 publicly available DNA methylation datasets  
86 from GEO and calculated biological age based on multiple aging clocks (Figure 1). In total,  
87 *ClockBase* contains biological age information for ~200,000 human and mouse samples (Figure  
88 1). We standardized metadata for each experiment, which allows users to search for diseases and  
89 treatments of interest and examine biological age under a variety of experimental conditions. All  
90 data are available for download. Besides preprocessed data, users can upload their data to  
91 *ClockBase* and calculate predicted biological age.

92 *ClockBase* provides an interactive analysis tool that allows users to perform statistical analyses  
93 and visualization of biological age online. We also embedded each sample into a low-  
94 dimensional space which allows users to explore data interactively. Our toolkit includes group  
95 comparison, which allows users to compare biological age across different experimental groups;  
96 correlation analysis, which allows users to explore the relationship between biological age and  
97 other numeric variables, or the correlation across different clock models; and accuracy analysis,  
98 which allows users to explore the accuracy of clock models. All plots and statistical results are  
99 available for download. We also created a companion R package called *ClockBasis*, that allows  
100 users to calculate biological age of their samples. *ClockBase* is available at <https://clockbase.org>

### 101 ***ClockBase* offers insights into the relationship among clock models**

102 To understand the biological meaning and relationship among aging clocks, it is important to  
103 compare different clocks and have information on their correlation. Although several studies re-  
104 ported on this topic, all were performed with established human cohorts and biobanks<sup>35,36</sup>, which  
105 contain only a limited number of interventions and biological variables. As *ClockBase* consists  
106 of a large number of samples with highly diverse biological statuses, it provides a unique oppor-  
107 tunity for exploring the relationship among different clock models in a much more diverse sam-  
108 ple population. We first explored the distribution of biological age measurement across 192,635  
109 highly diverse human samples (Figure 2a). Among them, 80,346 samples also had age infor-  
110 mation. We, therefore, calculated biological age acceleration for the samples based on each clock  
111 (delta age, which is calculated as predicted age minus real age). Note that DunedinPoAm and  
112 DunedinPACE are predictors of the pace of age that is independent of the age of samples and is

113 centered at 1. We then examined the distribution of biological age acceleration across the sam-  
114 ples (Figure 2b). chi-square test was performed to determine whether there are significantly more  
115 samples with accelerated biological age or decelerated biological age. Interestingly, while  
116 DunedinPACE, HannumAge, HorvathAge, and ZhangAge clocks showed that there are signifi-  
117 cantly more age-accelerated samples, DunedinPoAm and PhenoAge revealed the opposite effect  
118 (i.e. there are significantly more age-decelerated samples), whereas PedBE clock showed no sig-  
119 nificant difference. This suggests that different clocks may measure different aspects of aging  
120 and therefore have a disagreement on the biological age of samples.

121 We further analyzed correlation across biological age prediction based on seven aging clock  
122 models (Figure 2c, d). Prior to adjusting for age, PedBE, Horvath Clock, Zhang clock, Hannum  
123 Clock, and PhenoAge showed strong correlation with one another, with Pearson's correlation  
124 coefficients ranging from 0.59 (PhenoAge and PedBE) to 0.85 (Zhang clock and Hannum  
125 Clock). Correlations between DunedinPoAm/DunedinPACE and other clocks were low. This is  
126 expected as both DunedinPoAm and DunedinPACE measure the rate of aging, which shows only  
127 a weak correlation with chronological age<sup>16</sup>. Yet surprisingly, Pearson's correlation coefficient  
128 between DunedinPoAm and DunedinPACE was -0.05.

129 After adjusting for age, the five epigenetic age clocks (Horvath Clock, Zhang clock, Hannum  
130 Clock, PedBE, and PhenoAge) still showed a significant, yet weaker, positive correlation (Figure  
131 2d). Pearson's correlation coefficients ranged from 0.31 (HorvathAge and PhenoAge) to 0.89  
132 (ZhangAge and PedPE). DunedinPoAm and DunedinPACE still showed a weak correlation with  
133 all other clocks. Notably, DunedinPACE has a significant negative correlation with all other  
134 clocks except HorvathAge. These findings reveal the internal discrepancy among different aging  
135 clocks when applied to diverse biological samples.

136 To better visualize inconsistency among different aging clocks, we embedded each sample into  
137 two-dimensional space by performing UMAP on biological age predictions from each clock  
138 model (Figure 3a, b). Locations of the samples on UMAP embedding indicated the relationship  
139 among biological age prediction for different aging clocks.

140 As a demonstration, we show that although DunedinPACE has a very weak correlation with oth-  
141 er aging clock models, it predicts iPSCs and ESCs to have extremely slow rates of aging, which

142 is related to other clock models that revealed consistently low ages of these cells following long-  
143 term maintenance in culture. Therefore, iPSCs/ESCs form a unique cluster in the UMAP space.  
144 Similarly, cells overexpressing DNA methyltransferases (DNMTs) are predicted to be relatively  
145 young based on Horvath Clock and PhenoAge, and also have a very slow rate of aging based on  
146 DunedinPACE<sup>37</sup>. In contrast, during induced differentiation *in vitro*, hepatocytes appear to be  
147 more than 200 years old based on Horvath Clock and PhenoAge and also exhibit an extremely  
148 fast rate of aging<sup>38</sup>.

149 In general, samples form a trajectory in the UMAP space, where the upper left corner represents  
150 biologically older samples and the lower right and lower left corners younger samples (Figure  
151 3a). The branching of the trajectory indicates disagreement among different aging clocks. For  
152 example, the lower left branch has low biological age prediction based on HannumAge,  
153 HorvathAge, PhenoAge, and ZhangAge clocks. Yet PedBE shows a moderate biological age  
154 prediction, and DunedinPoAm shows that this region contains samples with an accelerated pace  
155 of aging. The discrepancy becomes even more obvious when we used biological age acceleration  
156 (delta age) as the attribute for t-SNE embedding (Figure 3c). The interactive three-dimensional  
157 UMAP and t-SNE embedding are available in the ClockBase online analysis tool.

### 158 ***ClockBase* facilitates the discovery of longevity interventions and age-accelerating condi-** 159 **tions**

160 To demonstrate the utility of *ClockBase* for identifying novel longevity interventions and age-  
161 accelerating conditions, we show two datasets that to our knowledge have not been studied in the  
162 context of biological aging. In the first dataset (GSE60446), two different cholangiocarcinoma  
163 cell types, TFK-1 and HuCCT1, were treated with a DNA methyltransferase inhibitor zebularine  
164 (1-( $\beta$ -D-ribofuranosyl)-1,2-dihydropyridine-2-one)<sup>39</sup>. Through only a few clicks on the  
165 *ClockBase* online statistical analysis tool, we found that the zebularine treatment significantly  
166 reduces the epigenetic age based on almost all clock models and in both cell lines (Figure 4a). In  
167 addition, both DunedinPoAm and DunedinPACE showed that the zebularine-treated cells exhib-  
168 ited a slower pace of aging. Zebularine has never been studied for its role in rejuvenation, and  
169 our results suggest that this compound is a potential longevity intervention, which may be further  
170 studied in future studies.

171 The second example is from GSE63704, which includes 204 plasma DNA methylation samples  
172 representing healthy controls and lung cancer, pulmonary fibrosis, and chronic obstructive pul-  
173 monary disease (COPD) patients<sup>40</sup>. We observed that pulmonary fibrosis patients exhibit a sig-  
174 nificantly higher epigenetic age compared to control patients, based on Horvath Clock, PedBE,  
175 Zhang clock, and Hannum Clock models (Figure 4b). Additionally, DunedinPACE showed that  
176 pulmonary fibrosis patients had a significantly faster pace of aging. Notably, both of these exam-  
177 ples were semi-randomly selected for demonstration purposes, suggesting that there are many  
178 other potential associations that remain to be explored by future *ClockBase* users.

## 179 Discussion

180 The emergence of aging clocks provided researchers with promising tools to estimate the age of  
181 biological samples and shed light on the associated biology. However, there are currently multi-  
182 ple dozens of aging clocks that have been created, making it increasingly important to under-  
183 stand the relationship between different aging clocks<sup>8,41-43</sup>. There have been some efforts to  
184 compare clocks based on established human cohorts and biobanks<sup>35,36</sup>, but these studies are lim-  
185 ited in both clocks examined and the dataset used. *ClockBase* currently contains DNA methyla-  
186 tion for both mice and humans, with much more diverse sample coverage compared to human  
187 biobanks. We believe that this resource can be used to help researchers to understand the rela-  
188 tionship between clocks in different experimental settings.

189 Another challenge is that it is currently hard for non-computational experts in the field to use ag-  
190 ing clocks, as they usually require different transformations and data preprocessing. Even for  
191 computational biologists, downloading individual datasets from GEO and preprocessing each of  
192 them is a time-consuming task. *ClockBase* is designed to provide a simple and easy-to-use inter-  
193 face for biologists to perform statistical analyses and visualization of biological age. Only a GSE  
194 accession identifier and a few clicks are required for analyzing a dataset from GEO. This could  
195 remove the barrier for researchers and domain experts to use and understand the aging clocks.

196 We illustrated the utility of *ClockBase* by discovering zebularine, a potent DNMT inhibitor,  
197 which affects the methylation status of the samples by directly targeting the DNA methylation  
198 machinery<sup>44</sup>. Our data suggest that zebularine is a candidate longevity intervention, as it signifi-  
199 cantly reduced the epigenetic age of cultured cells based on almost all clock models. However,



200 as zebularine affects the DNA methylation machinery, DNA methylation clocks should be used  
201 with caution. Further investigation and *in vivo* studies are required to understand the role of  
202 zebularine in the aging process.

203 We believe many other potential anti-aging interventions are hidden in a large number of availa-  
204 ble experimental conditions, that could be explored and explained by domain experts.

## 205 **MATERIALS AND METHODS**

### 206 **Data collection**

207 The data used in this study were downloaded before July 30th, 2022, from Gene Expression  
208 Omnibus (GEO, <https://www.ncbi.nlm.nih.gov/geo>). Raw data were downloaded using the R  
209 package GEOquery (<https://bioconductor.org/packages/release/bioc/html/GEOquery.html>), and  
210 metadata were extracted using the R package GEOmetadb  
211 (<https://www.bioconductor.org/packages/release/bioc/html/GEOmetadb.html>). For mouse DNA  
212 methylation analyses, all GEO entries associated with “Methylation profiling by high throughput  
213 sequencing” were collected; for human DNA methylation analyses, all GEO entries associated  
214 with “Methylation profiling by (genome tiling, SNP, or other) array” were collected. Methylation  
215 level data were then downloaded from supplementary files of each GEO entry. Only the datasets  
216 with at least 6 samples were used for downstream analyses.

### 217 **Methylation data preprocessing**

218 Existing mouse DNA methylation data are not uniformly structured. A custom R script was used  
219 to identify CpG sites and methylation levels of each sample and then standardize data format.  
220 Metadata are standardized based on the custom pipeline aspired by refine.bio<sup>28</sup>. Datasets with  
221 missing information or in unrecognized format were excluded. Then, for both mouse and human  
222 DNA methylation data, the range of methylation levels was standardized to the 0-1 scale. The  
223 data with out-of-range values were replaced with missing values. We impute missing methyla-  
224 tion level data using mean methylation for the reference dataset. For humans, we used 2,664  
225 blood samples measured using the 450k Human Methylation Beadchip as a reference<sup>29</sup>. For  
226 mice, since sequencing-based methods were used, DNA methylation data were more sparse  
227 compared to array-based data. Therefore, we first imputed missing values based on mean meth-  
228 ylation levels within 100 base-pair regions, as it was reported in a previous study that the nearby



229 sites tend to exhibit a high correlation with regard to methylation levels<sup>30</sup>. For the sites still hav-  
230 ing missing values, we imputed missing values based on the mean methylation levels of the ref-  
231 erence dataset from Petkovich et al.<sup>18</sup>. We report the ratio of missingness for each clock model.  
232 In general, samples with more than 20% missing values were considered unreliable for biological  
233 age prediction; however, we included them in the database with a warning message as they may  
234 still provide information.

235 The code for all the preprocessing steps is included in the ClockBasis R package  
236 (<https://github.com/albert-ying/ClockBasis>).

### 237 **Aging clock models implementation**

238 Aging clock models were implemented on the web server and precalculated for all datasets, in-  
239 cluding 4 mouse epigenetic clocks and 7 human epigenetic clocks. The following mouse epige-  
240 netic clocks were included: Petkovich blood clock (90 sites)<sup>18</sup>, Meer multi-tissue clock (435  
241 sites)<sup>19</sup>, Thompson multi-tissue clock (582 sites)<sup>31</sup>, and Wang liver clock (148 sites)<sup>32</sup>. The fol-  
242 lowing human epigenetic clocks were included: Horvath multi-tissue clock (353 sites)<sup>11</sup>,  
243 Hannum clock (71 sites)<sup>12</sup>, PhenoAge (513 sites)<sup>13</sup>, PedBE pediatric buccal clock (94 sites)<sup>33</sup>,  
244 Zhang blood clock (514 sites)<sup>34</sup>, DunedinPOAm (46 sites)<sup>15</sup>, and DunedinPACE (173 sites)<sup>16</sup>.

245 All clock models are publicly available and could be downloaded from the original source. All  
246 epigenetic clocks are also available as functions in the ClockBasis R package.

### 247 **Online statistical analysis**

248 Three types of statistical analysis were implemented in the *ClockBase* online interface.

249 (1) Group comparison: the group comparison function allows users to compare the biological  
250 age or another numeric variable across different experimental groups in the dataset. The  
251 pairwise T-test is performed across each group and p-value is adjusted by the number of  
252 comparisons using the Benjamini-Hochberg procedure. p-value for ANOVA across all  
253 groups is also reported. The result is an output in the form of a boxplot followed by the  
254 result table.

255 (2) Correlation: the correlation function allows users to calculate Pearson's correlation across  
256 two numeric variables in the dataset. The result is an output in the form of a scatter plot  
257 with regression lines. Pearson's correlation coefficient and p-value are also reported. Us-  
258 ers can further calculate correlations within each subgroup of the dataset and report statis-  
259 tics separately. Notably, this function is also useful for quality control by visualizing cor-  
260 relation between biological age prediction and percentage missingness of the data. This

261 could avoid reporting false positive results due to imbalanced missingness across experi-  
262 mental groups.

263 (3) Accuracy: the accuracy function allows users to calculate accuracy of biological age pre-  
264 diction when the true age is given in the dataset. Pearson's R, RMSE, MAE, and p-value  
265 are reported.

266

## 267 **Data availability**

268 All data are available on the *ClockBase* online resource (<https://clockbase.org>) and GEO  
269 (<https://www.ncbi.nlm.nih.gov/geo/>).

## 270 **Code availability**

271 All codes are available in the ClockBasis R package (<https://github.com/albert-ying/ClockBasis>)

## 272 **Acknowledgments**

273 We thank all the Gladyshev lab members for their helpful discussions and suggestions. We espe-  
274 cially thank Miss. Ying Fang for her help in designing the *ClockBase* logo and webpage. Sup-  
275 ported by NIA grants to VNG.

## 276 **Author contributions**

277 K.Y. and A.T. initiated the study; K.Y. collected the data; V.N.G supervised the study. K.Y.,  
278 A.T., and H.L. performed data analyses; All authors contributed to paper preparation and data  
279 interpretation.

## 280 **Competing interest statement**

281 The authors declare no competing financial interests.

## 282 **Figure legends**

283 **Figure 1. *ClockBase* overview.** Schematic diagram shows data sources and main functionalities  
284 of the *ClockBase* online resource.

285 **Figure 2. Distribution and correlation of biological age in human samples. a.** Density plot  
286 shows the distribution of biological age measurements across 192,635 samples based on 7 human  
287 DNAm aging clocks. **b.** Density plot shows the distribution of biological age acceleration across  
288 80,346 samples with chronological age annotation. Dashed line shows the boundary between  
289 samples with accelerated and decelerated ages. chi-square test was performed, and the ratio and  
290 p-value are shown above the plots **c,d.** Correlation plot shows Pearson's correlation across dif-  
291 ferent biological age measurements (**c**) and biological age acceleration (**d**). Upper triangle: Pear-  
292 son's correlation plot; lower triangle: Pearson's correlation coefficient. Areas of the squares rep-  
293 resent the absolute value of corresponding Pearson's correlations. P values are corrected using  
294 Bonferroni correction for 21 tests with  $P_{\text{adjusted}} < 0.05$ .

295 **Figure 3. ClockBase reveals discrepancy across different biological age measurements. a, b.**  
296 The UMAP plot of 192,635 human DNA methylation samples. Colors of the dots represent bio-  
297 logical age prediction based on HorvathAge (**a**) and other human DNAm clocks (**b**). **c.** t-SNE  
298 plot of 80,346 human DNA methylation samples with chronological age annotation. Colors of  
299 the dots represent biological acceleration based on each clock.

300 **Figure 4. Identifying novel biological age-modifying conditions using ClockBase. a.** Epige-  
301 netic age comparison between zebularine-treated and untreated cells. **b.** Epigenetic age compari-  
302 son across healthy control, lung cancer, pulmonary fibrosis (fibrosis), and COPD patients. Boxes  
303 indicate 25–75% interquartile ranges, and whiskers indicate minimum to maximum. \*  $P_{\text{adjusted}} <$   
304 0.05, \*\*  $P_{\text{adjusted}} < 0.01$ , \*\*\*  $P_{\text{adjusted}} < 0.001$ , \*\*\*\*  $P_{\text{adjusted}} < 0.0001$ . COPD: chronic obstructive  
305 pulmonary disease.

306

## 307 References

308

- 309 1. Chang, A. Y., Skirbekk, V. F., Tyrovolas, S., Kassebaum, N. J. & Dieleman, J. L. Measuring population ageing: an analysis of the Global  
310 Burden of Disease Study 2017. *Lancet Public Health* **4**, e159–e167 (2019).
- 311 2. Chauhan, A. *et al.* Systems biology approaches in aging research. *Interdiscip Top Gerontol* **40**, 155–76 (2015).
- 312 3. Bakula, D. *et al.* Aging and drug discovery. *Aging* **10**, 3079–3088 (2018).
- 313 4. Gladyshev, T. V. & Gladyshev, V. N. A Disease or Not a Disease? Aging As a Pathology. *Trends Mol Med* **22**, 995–996 (2016).
- 314 5. Barzilai, N., Cuervo, A. M. & Austad, S. Aging as a Biological Target for Prevention and Therapy. *JAMA* **320**, 1321–1322 (2018).
- 315 6. Rutledge, J., Oh, H. & Wyss-Coray, T. Measuring biological age using omics data. *Nat. Rev. Genet.* (2022) doi:10.1038/s41576-022-  
316 00511-7.
- 317 7. Ludwig, F. C. & Smoke, M. E. The measurement of biological age. *Exp. Aging Res.* **6**, 497–522 (1980).
- 318 8. Macdonald-Dunlop, E. *et al.* A catalogue of omics biological ageing clocks reveals substantial commonality and associations with disease  
319 risk. *Aging* **14**, 623–659 (2022).
- 320 9. Trapp, A., Kerepesi, C. & Gladyshev, V. N. Profiling epigenetic age in single cells. *Nat. Aging* **1**, 1189–1201 (2021).
- 321 10. Quach, A. *et al.* Epigenetic clock analysis of diet, exercise, education, and lifestyle factors. *Aging* **9**, 419–446 (2017).
- 322 11. Horvath, S. DNA methylation age of human tissues and cell types. *Genome Biol.* **14**, R115 (2013).
- 323 12. Hannum, G. *et al.* Genome-wide methylation profiles reveal quantitative views of human aging rates. *Mol. Cell* **49**, 359–367 (2013).
- 324 13. Levine, M. E. *et al.* An epigenetic biomarker of aging for lifespan and healthspan. *Aging* **10**, 573–591 (2018).
- 325 14. Lu, A. T. *et al.* DNA methylation GrimAge strongly predicts lifespan and healthspan. *Aging* **11**, 303–327 (2019).
- 326 15. Belsky, D. W. *et al.* Quantification of the pace of biological aging in humans through a blood test, the DunedinPoAm DNA methylation  
327 algorithm. *eLife* **9**, e54870 (2020).
- 328 16. Belsky, D. W. *et al.* DunedinPACE, a DNA methylation biomarker of the pace of aging. *eLife* **11**, e73420 (2022).
- 329 17. Ying, K. *et al.* Causal Epigenetic Age Uncouples Damage and Adaptation. 2022.10.07.511382 Preprint at  
330 <https://doi.org/10.1101/2022.10.07.511382> (2022).
- 331 18. Petkovich, D. A. *et al.* Using DNA methylation profiling to evaluate biological age and longevity interventions. *Cell Metab.* **25**, 954-960.e6  
332 (2017).
- 333 19. Meer, M. V., Podolskiy, D. I., Tyshkovskiy, A. & Gladyshev, V. N. A whole lifespan mouse multi-tissue DNA methylation clock. *eLife* **7**,  
334 e40675 (2018).
- 335 20. Galkin, F., Zhang, B., Dmitriev, S. E. & Gladyshev, V. N. Reversibility of irreversible aging. *Ageing Res Rev* **49**, 104–114 (2019).
- 336 21. Fahy, G. M. *et al.* Reversal of epigenetic aging and immunosenescent trends in humans. *Aging Cell* **18**, e13028 (2019).
- 337 22. Lu, Y. *et al.* Reprogramming to recover youthful epigenetic information and restore vision. *Nature* **588**, 124–129 (2020).
- 338 23. Alle, Q. *et al.* A single short reprogramming early in life improves fitness and increases lifespan in old age. *bioRxiv* 2021.05.13.443979  
339 (2021) doi:10.1101/2021.05.13.443979.

- 340 24. Maherali, N. *et al.* Directly Reprogrammed Fibroblasts Show Global Epigenetic Remodeling and Widespread Tissue Contribution. *Cell*  
341 *Stem Cell* **1**, 55–70 (2007).
- 342 25. Poganik, J. R. *et al.* Biological age is increased by stress and restored upon recovery. 2022.05.04.490686 Preprint at  
343 <https://doi.org/10.1101/2022.05.04.490686> (2022).
- 344 26. Di Lena, P., Sala, C. & Nardini, C. EstimAge: a webserver hub for the computation of methylation age. *Nucleic Acids Res.* **49**, W199–W206  
345 (2021).
- 346 27. Edgar, R., Domrachev, M. & Lash, A. E. Gene Expression Omnibus: NCBI gene expression and hybridization array data repository. *Nucle-*  
347 *ic Acids Res.* **30**, 207–210 (2002).
- 348 28. Casey S. Greene, Hu, D., Jones, R. W. W. & Stephanie Liu, David S. Mejia, Rob Patro, Stephen R. Piccolo, Ariel Rodriguez Romero,  
349 Hirak Sarkar, Candace L. Savonen, Jaclyn N. Taroni, William E. Vauclain, Deepashree Venkatesh Prasad, Kurt G. refine.bio: a resource of  
350 uniformly processed publicly available gene expression datasets.
- 351 29. Lehne, B. *et al.* A coherent approach for analysis of the Illumina HumanMethylation450 BeadChip improves data quality and performance  
352 in epigenome-wide association studies. *Genome Biol.* **16**, 37 (2015).
- 353 30. Zhang, W., Spector, T. D., Deloukas, P., Bell, J. T. & Engelhardt, B. E. Predicting genome-wide DNA methylation using methylation  
354 marks, genomic position, and DNA regulatory elements. *Genome Biol.* **16**, 14 (2015).
- 355 31. Thompson, M. J. *et al.* A multi-tissue full lifespan epigenetic clock for mice. *Aging* **10**, 2832–2854 (2018).
- 356 32. Wang, T. *et al.* Epigenetic aging signatures in mice livers are slowed by dwarfism, calorie restriction and rapamycin treatment. *Genome*  
357 *Biol.* **18**, 57 (2017).
- 358 33. McEwen, L. M. *et al.* The PedBE clock accurately estimates DNA methylation age in pediatric buccal cells. *Proc. Natl. Acad. Sci.* **117**,  
359 23329–23335 (2020).
- 360 34. Zhang, Y. *et al.* Neuronal TORC1 modulates longevity via AMPK and cell nonautonomous regulation of mitochondrial dynamics in *C.*  
361 *elegans*. *Elife* **8**, (2019).
- 362 35. Li, X. *et al.* Longitudinal trajectories, correlations and mortality associations of nine biological ages across 20-years follow-up. *Elife* **9**,  
363 (2020).
- 364 36. Crimmins, E. M., Thyagarajan, B., Levine, M. E., Weir, D. R. & Faul, J. Associations of Age, Sex, Race/Ethnicity, and Education With 13  
365 Epigenetic Clocks in a Nationally Representative U.S. Sample: The Health and Retirement Study. *J. Gerontol. Ser. A* **76**, 1117–1123  
366 (2021).
- 367 37. Kobayashi, Y. *et al.* DNA methylation profiling reveals novel biomarkers and important roles for DNA methyltransferases in prostate can-  
368 cer. *Genome Res.* **21**, 1017–1027 (2011).
- 369 38. Ancy, P.-B. *et al.* TET-Catalyzed 5-Hydroxymethylation Precedes HNF4A Promoter Choice during Differentiation of Bipotent Liver  
370 Progenitors. *Stem Cell Rep.* **9**, 264–278 (2017).
- 371 39. Nakamura, K. *et al.* DNA methyltransferase inhibitor zebularine induces human cholangiocarcinoma cell death through alteration of DNA  
372 methylation status. *PLoS One* **10**, e0120545 (2015).
- 373 40. Wielscher, M. *et al.* Diagnostic Performance of Plasma DNA Methylation Profiles in Lung Cancer, Pulmonary Fibrosis and COPD.  
374 *EBioMedicine* **2**, 929–936 (2015).

- 375 41. Levine, M. E., Higgins-Chen, A., Thrush, K., Minter, C. & Niimi, P. Clock Work: Deconstructing the Epigenetic Clock Signals in Aging,  
376 Disease, and Reprogramming. 2022.02.13.480245 Preprint at <https://doi.org/10.1101/2022.02.13.480245> (2022).
- 377 42. Bell, C. G. *et al.* DNA methylation aging clocks: challenges and recommendations. *Genome Biol* **20**, 249 (2019).
- 378 43. Horvath, S. & Raj, K. DNA methylation-based biomarkers and the epigenetic clock theory of ageing. *Nat Rev Genet* **19**, 371–384 (2018).
- 379 44. Yoo, C. B., Cheng, J. C. & Jones, P. A. Zebularine: a new drug for epigenetic therapy. *Biochem. Soc. Trans.* **32**, 910–912 (2004).
- 380

381 **Figures**

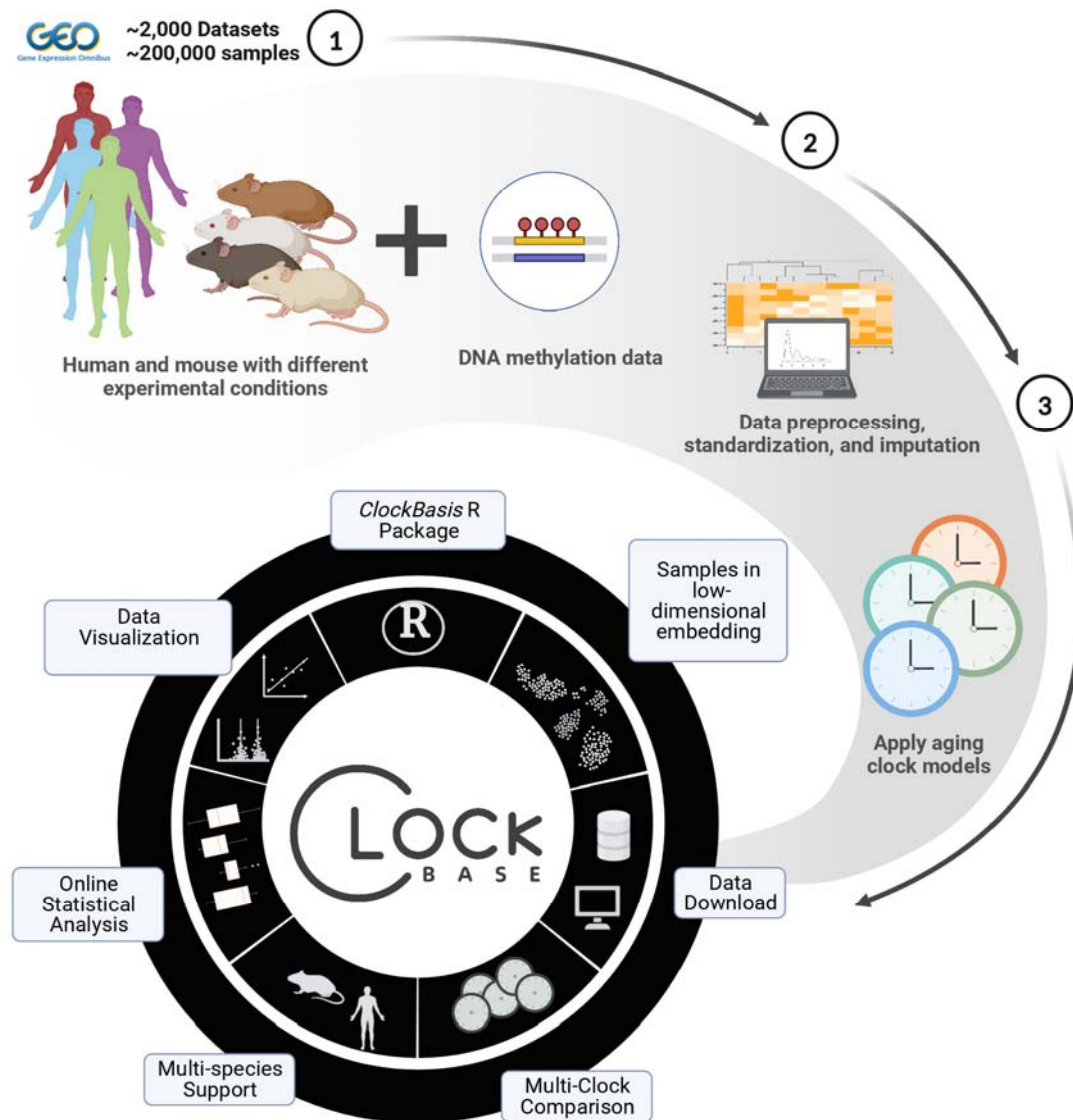

Figure 1

382



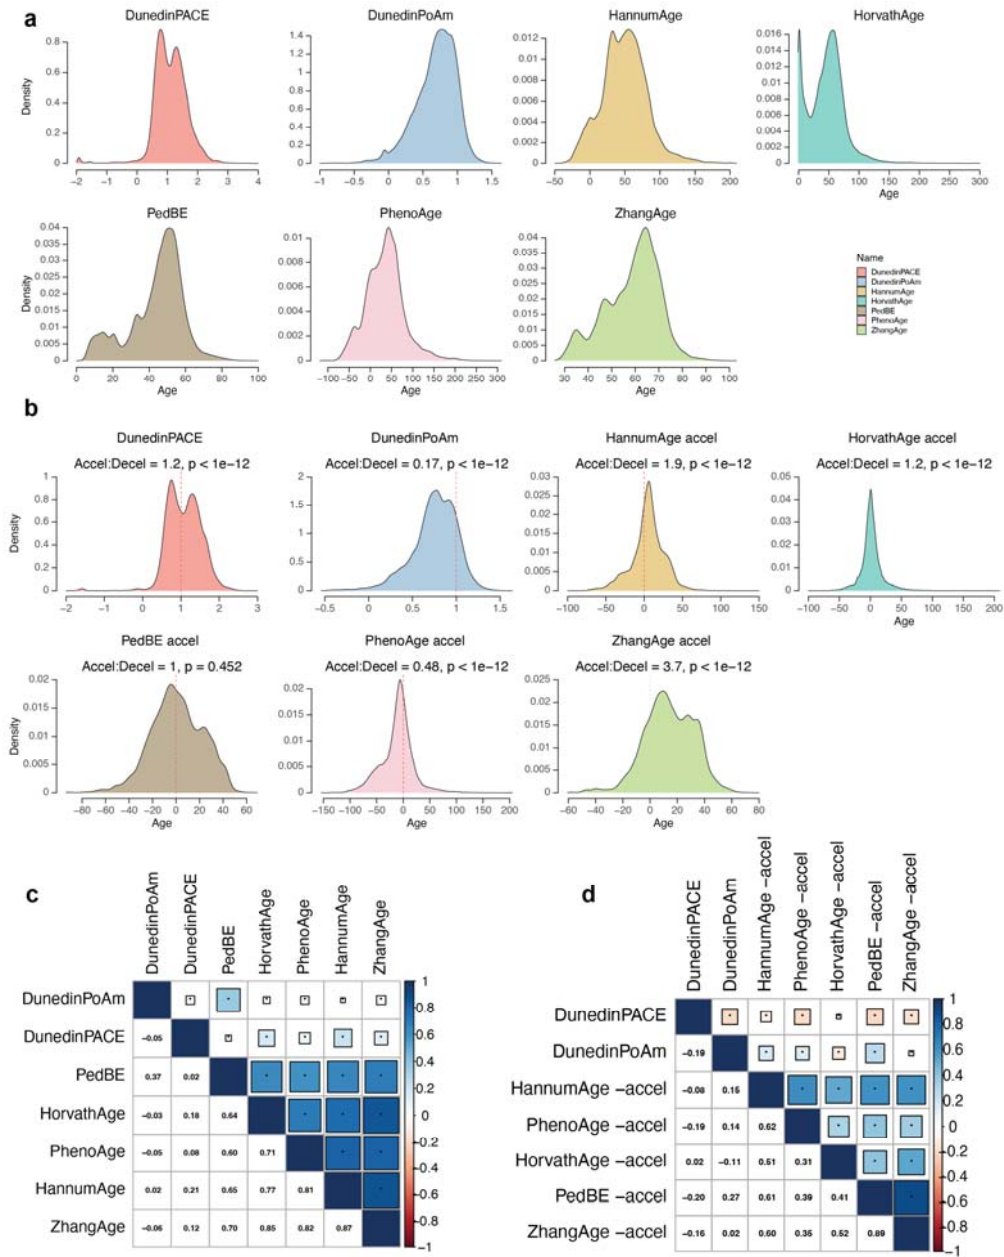

Figure 2

383

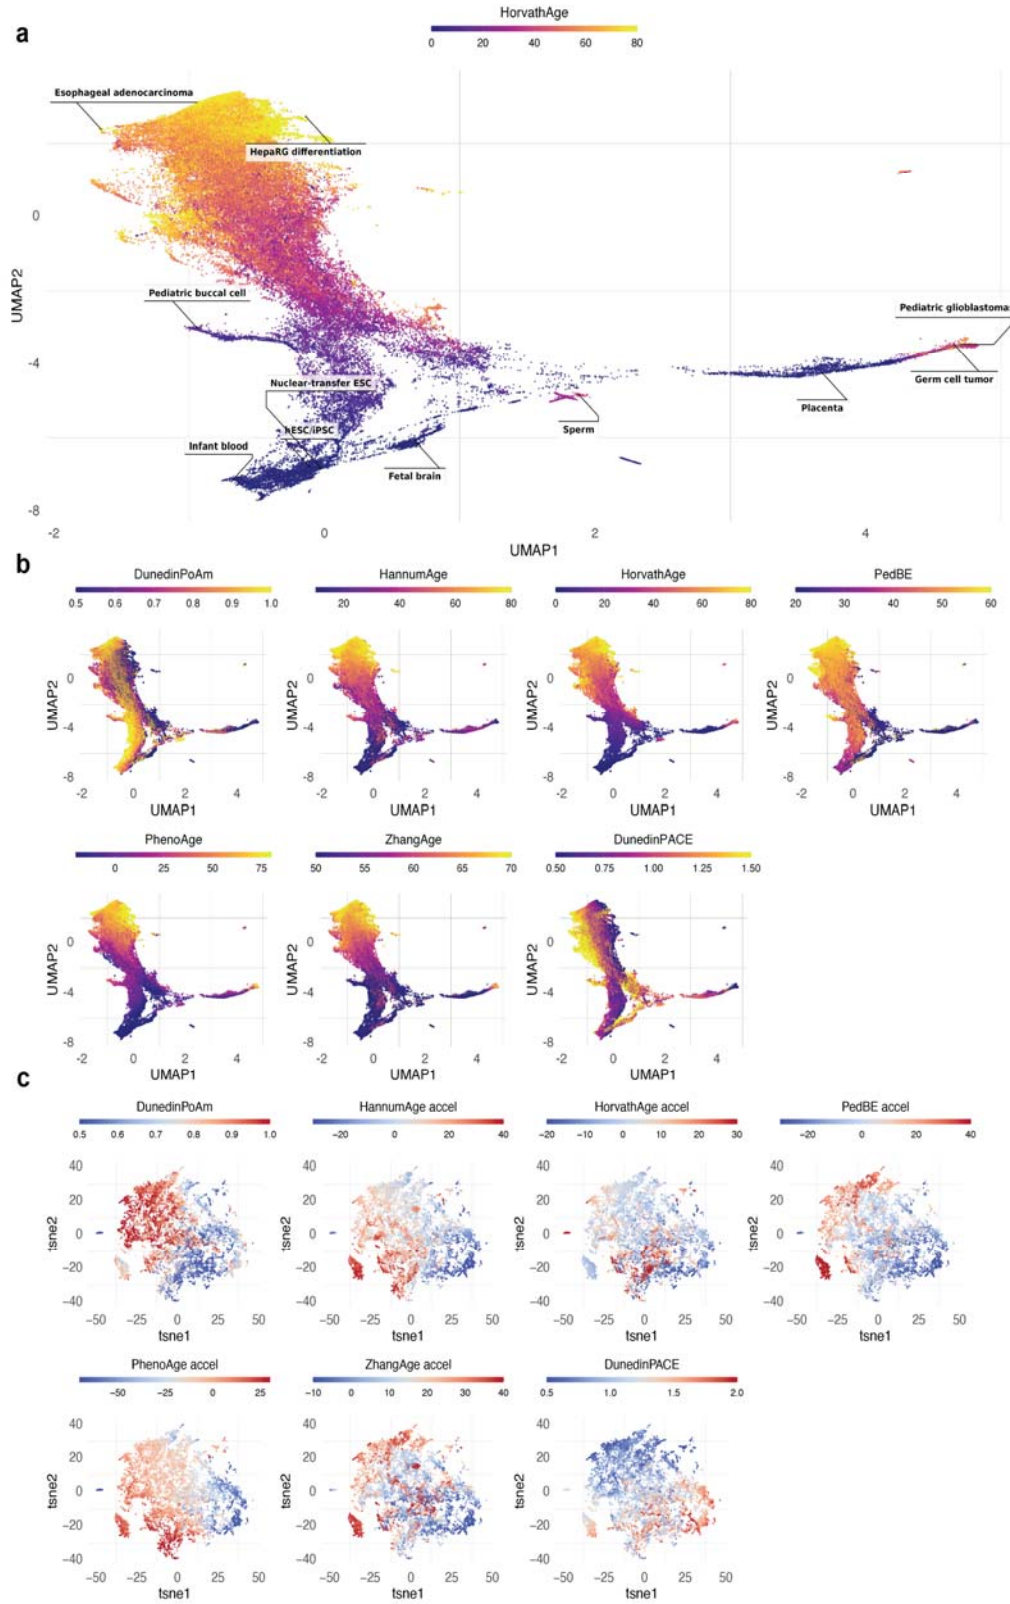

Figure 3

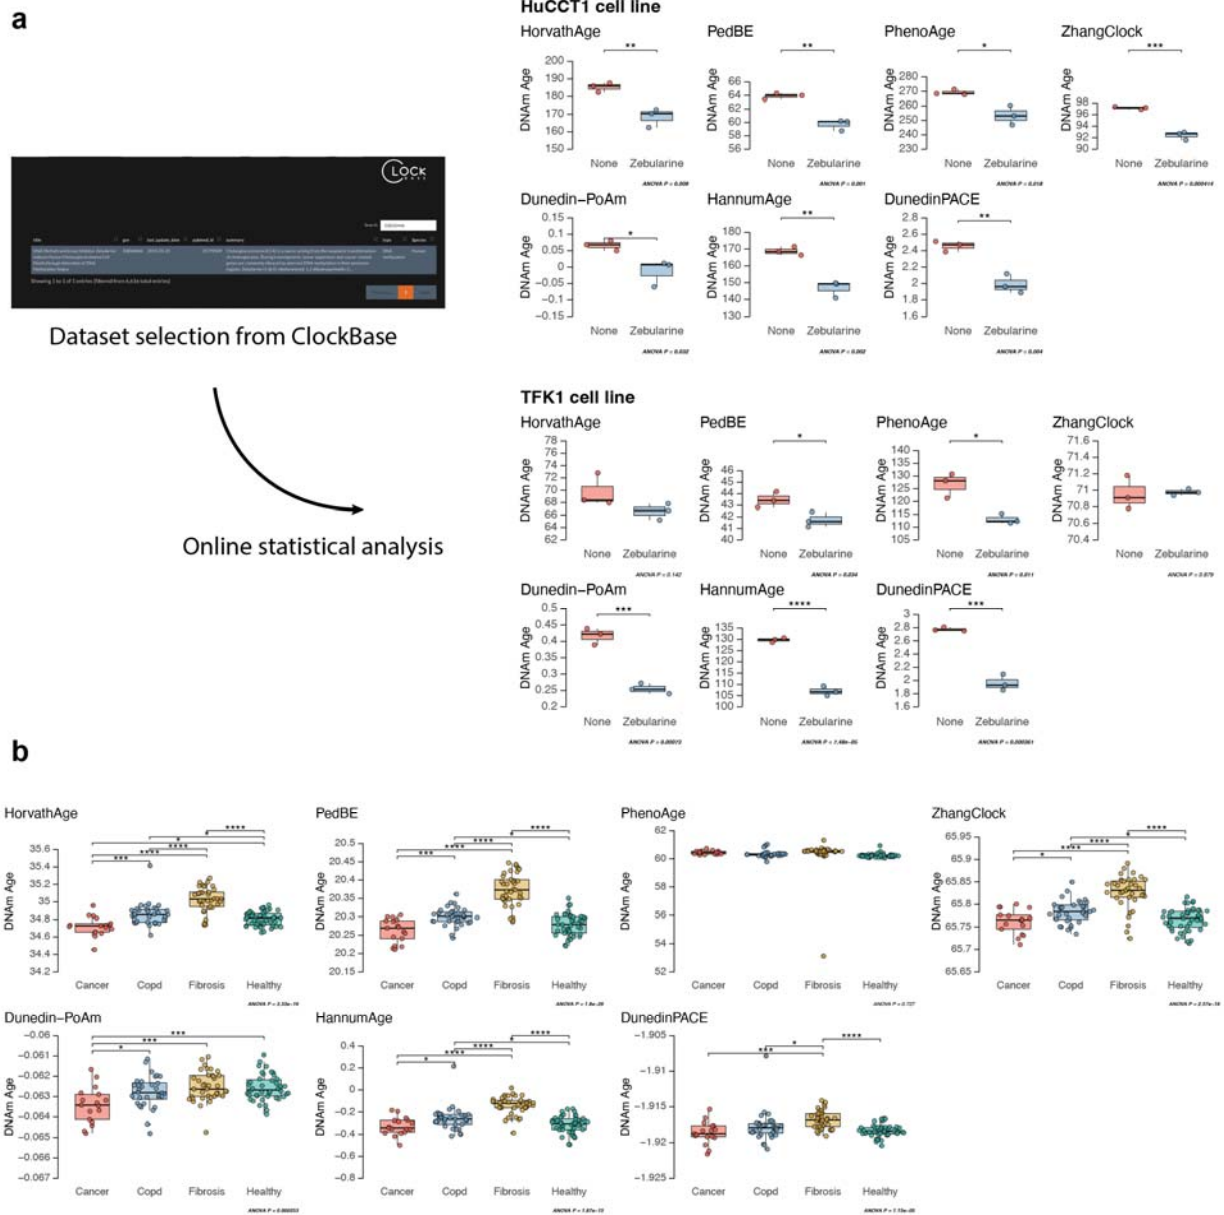

Figure 4

385
